# Supplementary material for: Protocol for an independent patient data meta-analysis of prophylactic mesh placement for incisional hernia prevention after abdominal aortic aneurysm surgery: a collaborative European Hernia Society project (I-PREVENT-AAA)
Source: PubMed Central journal article supplement (PMC11029178; doi:10.1136/bmjopen-2023-081046), 2024-04-16
Supplement: bmjopen-2023-081046supp002.pdf [file bmjopen-2023-081046supp002.pdf]

Suppl. A: Search strategies of the used databases

#### **medline ALL Ovid**

(Aortic Aneurysm, Abdominal / OR Aortic Aneurysm / OR ((Aneurysm /) AND Aorta, Abdominal /) OR ((aort\* ADJ3 aneurysm\*) OR aaa).ab,ti.) AND (Surgical Mesh / OR (mesh\* OR dynamesh\* OR vitamesh\* OR surgimesh\*).ab,ti.) AND (exp Preventive Health Services / OR prevention.fx. OR (prevent\* OR prophyla\* OR augment\* OR reinforce\*).ab,ti.)

#### **embase.com**

('abdominal aortic aneurysm'/exp OR 'aortic aneurysm'/de OR ((aneurysm/de OR 'aneurysm surgery'/de) AND 'abdominal aorta'/de) OR ((aort\* NEAR/3 aneurysm\*) OR aaa):Ab,ti) AND ('surgical mesh'/exp OR (mesh\* OR dynamesh\* OR vitamesh\* OR surgimesh\*):ab,ti) AND (prophylaxis/de OR prevention/de OR prevention:lnk OR (prevent\* OR prophyla\* OR augment\* OR reinforce\*):ab,ti)

#### **Web of science**

TS=(((aort\* NEAR/2 aneurysm\*) OR aaa)) AND ((mesh\* OR dynamesh\* OR vitamesh\* OR surgimesh\*)) AND ((prevent\* OR prophyla\* OR augment\* OR reinforce\*))

#### **Cochrane CENTRAL**

(((aort\* NEAR/3 aneurysm\*) OR aaa):Ab,ti) AND ((mesh\* OR dynamesh\* OR vitamesh\* OR surgimesh\*):ab,ti) AND ((prevent\* OR prophyla\* OR augment\* OR reinforce\*):ab,ti)

#### **Google scholar**

"aortic|aorta aneurysm|aneurysms" mesh|dynamesh|vitamesh|surgimesh  
preventive|prevention|prophylaxis|prophylactic|augmentation|reinforcement
